# Supplementary material
Source: PubMed Central journal article supplement (PMC5026405)
Supplement: ja5b11759_si_001.pdf [file ja5b11759_si_001.pdf]

## Supporting Information

### Nitrodibenzofuran: a One- and Two-Photon Sensitive Protecting Group that is Superior to Brominated Hydroxycoumarin for Thiol Caging in Peptides

M. Mohsen Mahmoodi, Daniel Abate-Pella, Tom J. Pundsack, Charuta C. Palsuledesai, Philip C. Goff, David A. Blank and Mark D. Distefano\*

Department of Chemistry, University of Minnesota, Minneapolis, Minnesota, 55455, USA

#### SYNTHESIS OF NDBF-BR

##### Scheme S1. Synthesis of NDBF-Br starting from dibenzofuran.

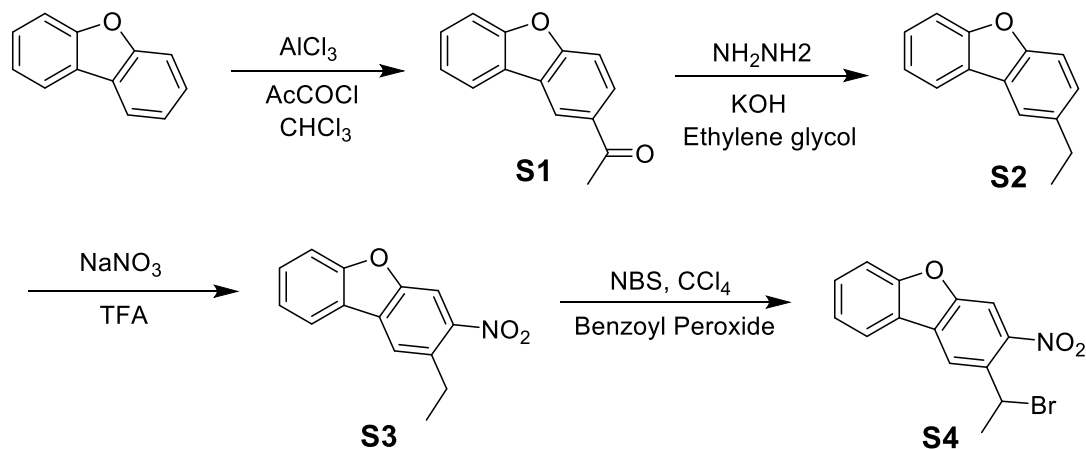

**Synthesis of 2-acetyldibenzofuran (S1).** Nitrodibenzofuran (2.5 g, 14.9 mmol) was dissolved in 30 mL of  $\text{CHCl}_3$  in a round bottom flask equipped with a stir bar. In a separate 100 mL flask, 2.4 g (17.8 mmol) of freshly ground  $\text{AlCl}_3$  was quickly added to 20 mL  $\text{CHCl}_3$  (to avoid minimize moisture absorption), followed by addition of 1.4 mL (19.3 mmol) of acetyl chloride. The mixture was allowed to stir vigorously for about 10-15 min until most of the solid  $\text{AlCl}_3$  was

dissolved. The resulting solution was slowly added to the solution of nitrodibenzofuran prepared above while stirring, which led to formation of a suspension. That mixture was allowed to stir for 2 h until the reaction reached almost complete conversion as judged by TLC (CH<sub>2</sub>Cl<sub>2</sub>). The mixture was poured into ice water and then diluted with 100 mL of 1.0 M NaOH<sub>(aq)</sub> solution followed by addition of 150 mL CH<sub>2</sub>Cl<sub>2</sub>. The two phases were stirred for 30 min until a clear organic phase was obtained. The organic layer was separated using a separatory funnel, and the aqueous phase was extracted with additional 100 mL of CH<sub>2</sub>Cl<sub>2</sub>. The combined organic layers were washed with brine and dried over Na<sub>2</sub>SO<sub>4</sub>. The solvent was evaporated *in vacuo*. The crude product was purified by silica gel column chromatography using CH<sub>2</sub>Cl<sub>2</sub> as the eluent. Solvent was evaporated *in vacuo* to afford 2.3 g (10.9 mmol) of compound **S1** as a white solid (73 % yield). In some cases, the final compound contains an impurity (less than 5% of 3-acetyldibenzofuran) which can be separated in further steps. <sup>1</sup>H NMR (500 MHz, CDCl<sub>3</sub>) δ 8.60 (1H, s), 8.12 (1H, dd, J = 2, 10 Hz), 8.01 (1H, d, J = 8.5 Hz), 7.59-7.62 (2H, m), 7.52 (1H, t, J = 7 Hz), 7.41 (1H, s), 2.73 (3H, s).

**Synthesis of 2-ethyl nitrodibenzofuran (S2).** In a round bottom flask, compound **S1** (2.1 g, 10.0 mmol) was combined with 40 mL of anhydrous ethylene glycol (40 mL), followed by addition of 1.4 g (25.0 mmol) of ground KOH and 0.78 mL (25 mmol) of hydrazine. The mixture was refluxed for 6 h until it was judged to be complete by TLC (Hexanes:EtOAc, 10:1, v/v). The reaction mixture was poured into ice water and then combined with 50 mL of 0.5 M aqueous HCl. The aqueous mixture was extracted with 3 × 100 mL CH<sub>2</sub>Cl<sub>2</sub> (efficient extraction is critical for obtaining higher yield). The organic phase was washed with brine, dried over Na<sub>2</sub>SO<sub>4</sub> and the solvent was evaporated *in vacuo*. The crude mixture was purified via silica gel column chromatography using a step gradient of solvents (Hexanes:EtOAc) starting from 10:1 (v/v)

going to 10:3 to afford 1.4 g of product **S2** (7.1 mmol) as a colorless oil (71 % yield). The column purification can usually be skipped if all starting material is consumed, since the resulting impurities with very low  $R_f$  values can be purified in later steps. However, in this case all of the residual ethylene glycol must be evaporated using a high vacuum pump.  $^1\text{H}$  NMR (500MHz,  $\text{CDCl}_3$ )  $\delta$  7.95 (1H, d,  $J = 7$  Hz), 7.79 (1H, s), 7.56 (1H, d,  $J = 8.5$  Hz), 7.49 (1H, d,  $J = 8$  Hz), 7.45 (1H, t,  $J = 7.5$  Hz), 7.29-7.36 (2H, m), 2.82 (2H, q,  $J = 7.5$  Hz), 1.34 (3H, t,  $J = 7.5$  Hz).

**Synthesis of 3-nitro-2-ethylidibenzofuran (NDBF, S3).** Compound **S2** (1.0 g, 5.1 mmol) was mixed with 30 mL of  $\text{CF}_3\text{CO}_2\text{H}$  in a round bottom flask equipped with a stir bar. 434 mg of  $\text{NaNO}_3$  (5.1 mmol) was added to the mixture while stirring, which caused the solution to turn dark (adding excess  $\text{NaNO}_3$  can cause formation of a dinitro byproduct which is hard to separate from the product, hence, adding one equivalent, or slightly less, of  $\text{NaNO}_3$  is safer). The resulting mixture was stirred for 2 h and judged completed by TLC (Hexanes: $\text{CH}_2\text{Cl}_2$ , 2:1, v/v). The mixture was poured into ice water and the resulting mixture was partitioned between 50 mL of 0.5 M  $\text{NaOH}_{(\text{aq})}$  and 100 mL  $\text{CH}_2\text{Cl}_2$ . The organic layer was separated, washed with brine and dried over  $\text{Na}_2\text{SO}_4$ . Solvent was evaporated *in vacuo* and the crude mixture was purified via silica column chromatography using a step gradient of solvent (Hexanes:  $\text{CH}_2\text{Cl}_2$ ) starting from 4:1 (v/v) going to 2:1 to afford 0.85 g of product **S3** (3.5 mmol) as a pale yellow oil (68.6 % yield).  $^1\text{H}$  NMR (500MHz,  $\text{CDCl}_3$ )  $\delta$  8.15 (1H, s), 8.01 (1H, d,  $J = 7.5$  Hz), 7.89 (1H, s), 7.62 (1H, d,  $J = 8$  Hz), 7.57 (1H, t,  $J = 8$  Hz), 7.42 (1H, t,  $J = 7.5$  Hz), 3.08 (2H, q,  $J = 7$  Hz), 1.39 (3H, t,  $J = 7.5$  Hz).

**Synthesis of 3-nitro-2-bromoethylidibenzofuran (NDBF-Br, S4).** Compound **S3** (0.70 g, 2.9 mmol), 0.52 g (2.9 mmol) of N-bromosuccinimide and 20 mg of benzoylperoxide was dissolved

in 20 mL of  $\text{CCl}_4$  and refluxed for 4 h. The mixture was cooled to room temperature, diluted with 50 mL of  $\text{CH}_2\text{Cl}_2$ , washed with 0.1 %  $\text{NaHCO}_3(\text{aq})$ , brine and then dried over  $\text{Na}_2\text{SO}_4$ . The solvent was evaporated *in vacuo* and the crude mixture was purified by silica column chromatography (EtOAc:Hexanes, 1:5, v/v) to afford 0.70 g of **S4** as a pale yellow solid (75 % yield). Characterization data has been previously reported by Davies and coworkers.<sup>1</sup>

#### ADDITIONAL FIGURES AND TABLES

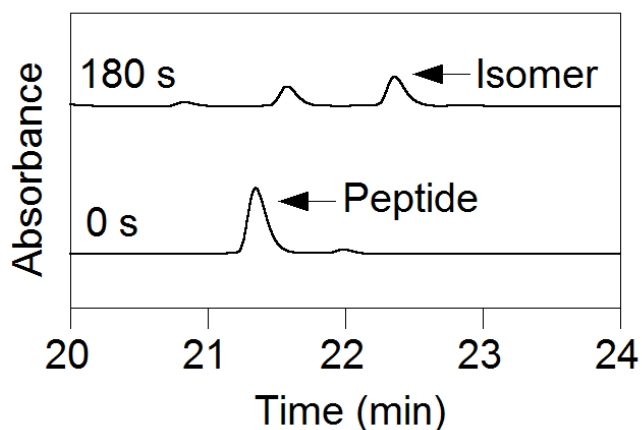

**Figure S1.** HPLC analysis of photolysis of 5-Fam-KKKSKTKC(Bhc)VIM. Formation of photo-isomer is apparent by the appearance of a new peak at higher retention time (22.25 min).

| Ion                          | Observed Mass | Calcd Mass | Ion                           | Observed Mass | Calcd Mass |
|------------------------------|---------------|------------|-------------------------------|---------------|------------|
| [M + 3H] <sup>+</sup>        | 635.2597      | 635.2644   | C <sub>4</sub> <sup>+</sup>   | 847.3990      | 847.4049   |
| A <sub>1</sub> <sup>+</sup>  | 459.1556      | 459.1644   | C <sub>4</sub> <sup>2+</sup>  | 424.2034      | 424.2072   |
| A <sub>1</sub> <sup>2+</sup> | 230.0817      | 230.1513   | C <sub>5</sub> <sup>+</sup>   | 975.4940      | 975.6281   |
| A <sub>2</sub> <sup>+</sup>  | 587.2505      | 587.2528   | C <sub>5</sub> <sup>2+</sup>  | 488.2509      | 488.1607   |
| A <sub>3</sub> <sup>2+</sup> | 358.1767      | 358.0726   | C <sub>6</sub> <sup>+</sup>   | 1076.5417     | 1076.4476  |
| A <sub>4</sub> <sup>+</sup>  | 802.3776      | 802.2346   | C <sub>6</sub> <sup>2+</sup>  | 538.7748      | 538.5560   |
| A <sub>5</sub> <sup>+</sup>  | 930.4725      | 930.3101   | X <sub>1</sub> <sup>+</sup>   | 176.0382      | 176.1213   |
| A <sub>6</sub> <sup>2+</sup> | 516.2640      | 516.1948   | X <sub>4</sub> <sup>+</sup>   | 743.1420      | 743.3497   |
| A <sub>7</sub> <sup>2+</sup> | 580.3115      | 580.2455   | X <sub>4</sub> <sup>2+</sup>  | 372.0750      | 372.1735   |
| A <sub>8</sub> <sup>2+</sup> | 757.7872      | 757.8033   | X <sub>5</sub> <sup>+</sup>   | 871.2370      | 871.3129   |
| A <sub>9</sub> <sup>2+</sup> | 807.3214      | 807.3227   | X <sub>8</sub> <sup>+</sup>   | 1187.4117     | 1187.6305  |
| B <sub>1</sub> <sup>+</sup>  | 487.1505      | 487.1560   | X <sub>8</sub> <sup>2+</sup>  | 594.2089      | 594.3130   |
| B <sub>2</sub> <sup>+</sup>  | 615.2455      | 615.2582   | X <sub>10</sub> <sup>+</sup>  | 722.3047      | 722.2593   |
| B <sub>2</sub> <sup>2+</sup> | 308.1267      | 308.1277   | Y <sub>1</sub> <sup>+</sup>   | 150.0589      | 150.0580   |
| B <sub>3</sub> <sup>+</sup>  | 743.3405      | 743.3497   | Y <sub>2</sub> <sup>+</sup>   | 263.1430      | 263.1445   |
| B <sub>3</sub> <sup>2+</sup> | 308.1267      | 308.1277   | Y <sub>4</sub> <sup>+</sup>   | 717.1628      | 717.1660   |
| B <sub>4</sub> <sup>+</sup>  | 830.3725      | 830.3805   | Y <sub>4</sub> <sup>2+</sup>  | 359.0853      | 359.0583   |
| B <sub>4</sub> <sup>2+</sup> | 415.6902      | 415.6909   | Y <sub>5</sub> <sup>+</sup>   | 845.2578      | 845.2841   |
| B <sub>5</sub> <sup>+</sup>  | 958.4674      | 958.4872   | Y <sub>6</sub> <sup>+</sup>   | 946.3054      | 946.3098   |
| B <sub>5</sub> <sup>2+</sup> | 479.7377      | 479.7498   | Y <sub>7</sub> <sup>+</sup>   | 1074.4004     | 1074.3961  |
| B <sub>6</sub> <sup>+</sup>  | 1059.5151     | 1059.5208  | Y <sub>8</sub> <sup>+</sup>   | 1161.4324     | 1161.4236  |
| B <sub>6</sub> <sup>2+</sup> | 530.2615      | 530.2635   | Y <sub>8</sub> <sup>2+</sup>  | 581.2201      | 581.2468   |
| B <sub>7</sub> <sup>+</sup>  | 1187.6101     | 1187.6305  | Y <sub>9</sub> <sup>2+</sup>  | 645.2676      | 645.2709   |
| B <sub>7</sub> <sup>2+</sup> | 594.3080      | 594.3130   | Y <sub>10</sub> <sup>2+</sup> | 709.3151      | 709.3033   |
| B <sub>8</sub> <sup>2+</sup> | 771.7846      | 771.7882   | Z <sub>1</sub> <sup>+</sup>   | 133.0324      | 133.0310   |
| B <sub>9</sub> <sup>2+</sup> | 821.3189      | 821.3290   | Z <sub>4</sub> <sup>+</sup>   | 700.1362      | 700.2449   |
| C <sub>1</sub> <sup>+</sup>  | 504.1771      | 504.1789   | Z <sub>5</sub> <sup>+</sup>   | 828.2312      | 828.3145   |
| C <sub>2</sub> <sup>+</sup>  | 632.2720      | 632.2689   | Z <sub>9</sub> <sup>2+</sup>  | 636.7543      | 636.5992   |
| C <sub>3</sub> <sup>+</sup>  | 760.3670      | 760.3704   |                               |               |            |

**Table S1.** Calculated and observed MS/MS fragments of the photoisomer derived from irradiation of 5-Fam-KKKSKTKC(Bhc)VIM.

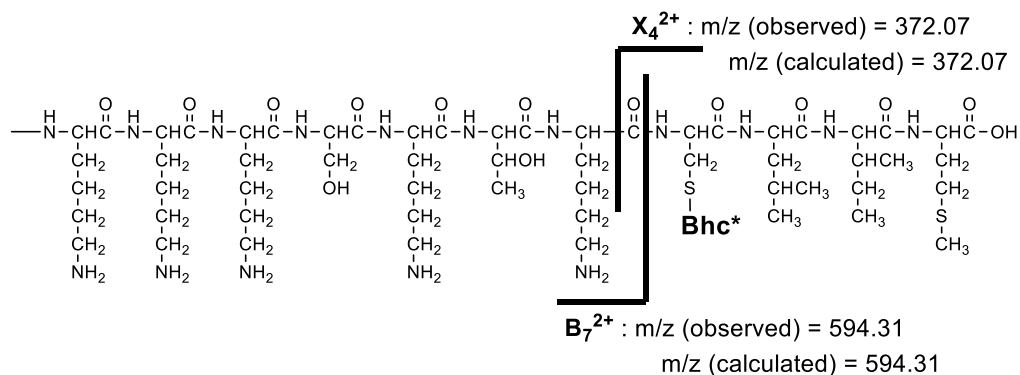

**Figure S2.** Two key MS/MS fragments of the photo-isomeric product of compound **5**, revealing that Bhc has not migrated to other residues within the peptide.

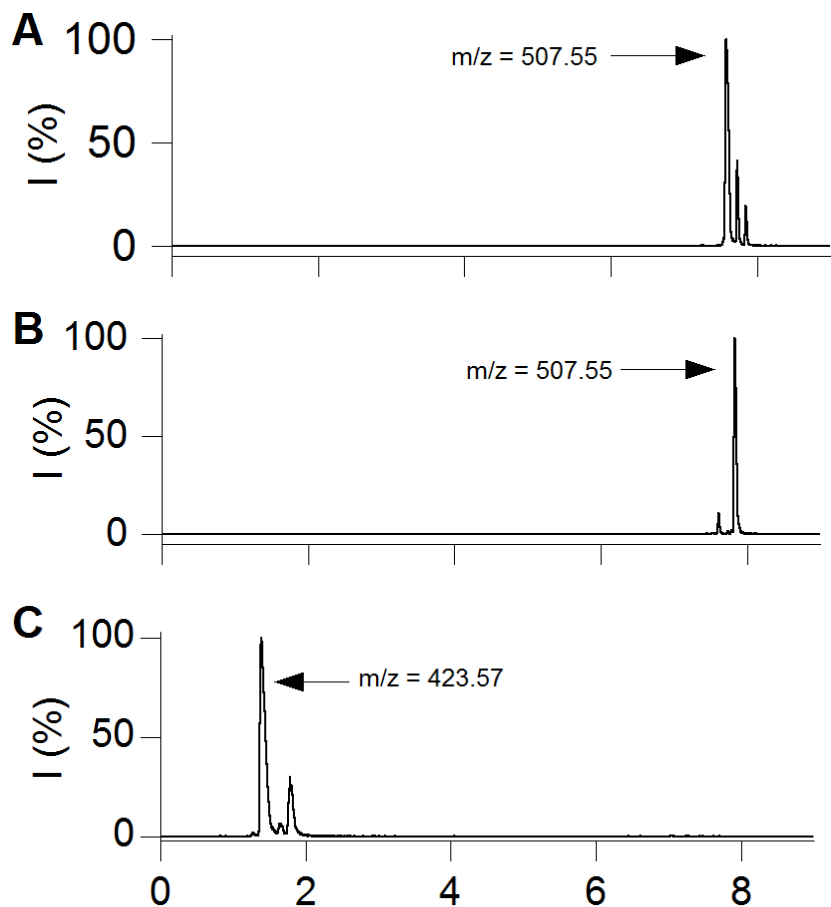

**Figure S3. LC/MS analysis of photolysis reactions containing KKKSSTKC(Bhc)CVIM.** (A) EIC chromatogram ( $m/z = 507.55$ ) of a sample of KKKSSTKC(Bhc)CVIM prior to exposure to UV light; (B) EIC chromatogram ( $m/z = 507.55$ ) of a photolyzed sample of KKKSSTKCC(Bhc)IM which clearly indicates formation of a new species with the same mass; (C) EIC chromatogram ( $m/z = 423.57$ ) of a photolyzed sample showing that free peptide has been generated upon photolysis as well.

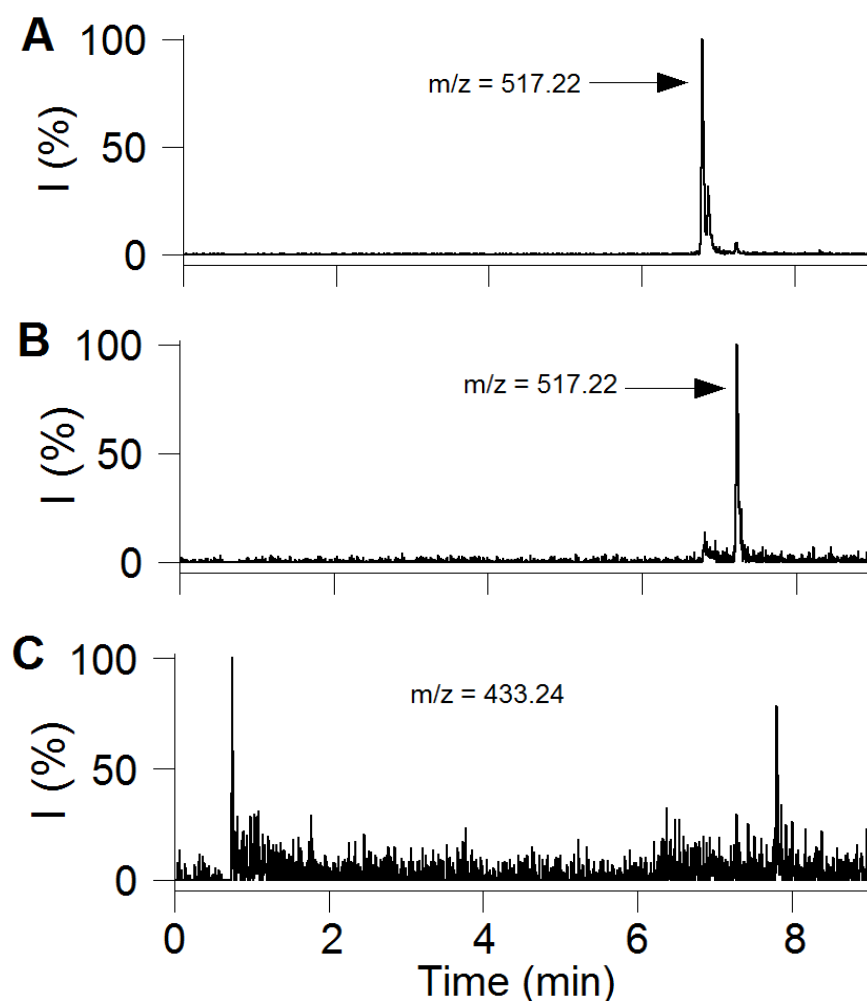

**Figure S4. LC/MS analysis of photolysis reactions containing KKKS<sub>2</sub>TKCC(Bhc)IM.** (A) EIC chromatogram ( $m/z = 517.22$ ) of a sample of KKKS<sub>2</sub>TKCC(Bhc)IM without any exposure to UV light; (B) EIC chromatogram ( $m/z = 517.22$ ) of a photolyzed sample of KKKS<sub>2</sub>TKCC(Bhc)CVIM which clearly indicates formation of a new species with the same mass; (C) EIC chromatogram ( $m/z = 433.24$ ) of a photolyzed sample of KKKS<sub>2</sub>TKCC(Bhc)CVIM showing that no significant level of free peptide has been generated upon photolysis.

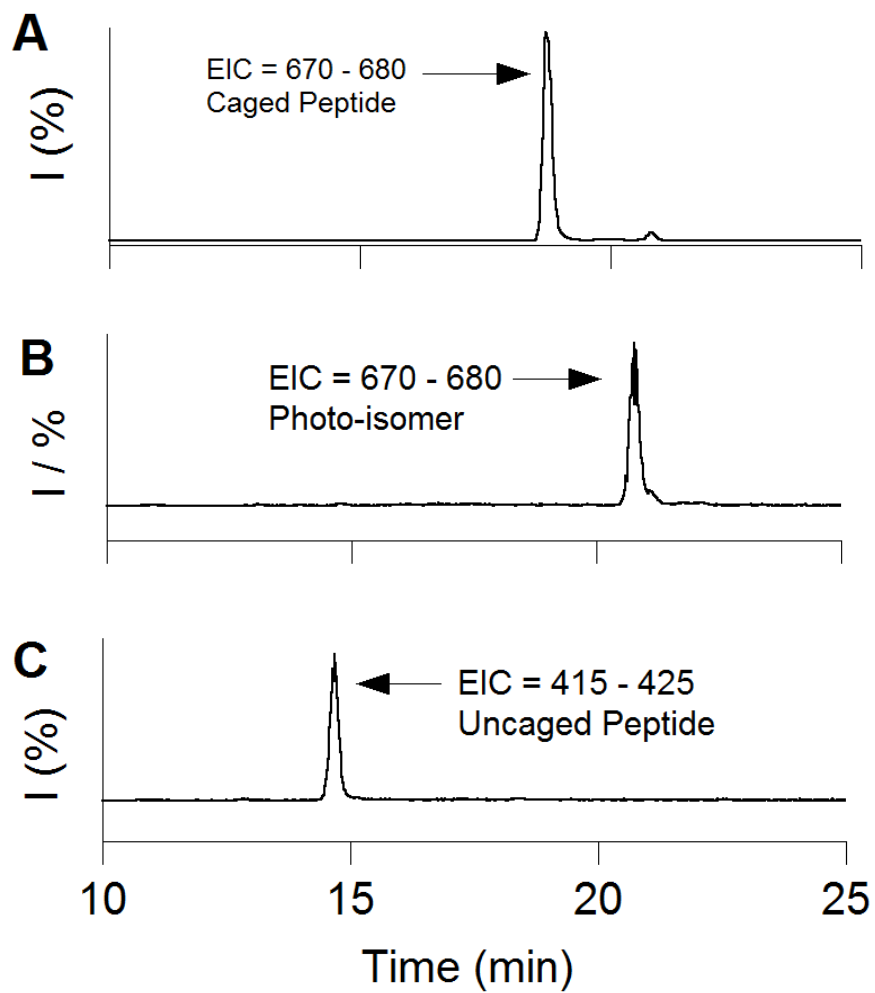

**Figure S5. LC/MS analysis of photolysis reactions containing C(Bhc)VLS.** (A) EIC chromatogram ( $m/z = 607 - 680$ ) of a sample of C(Bhc)VLS without any exposure to UV light, (B) EIC chromatogram of a photolyzed sample of C(Bhc)VLS indicating formation of photo-isomer ( $m/z = 607 - 680$ ) and (C) free peptide ( $415 - 425$ ).



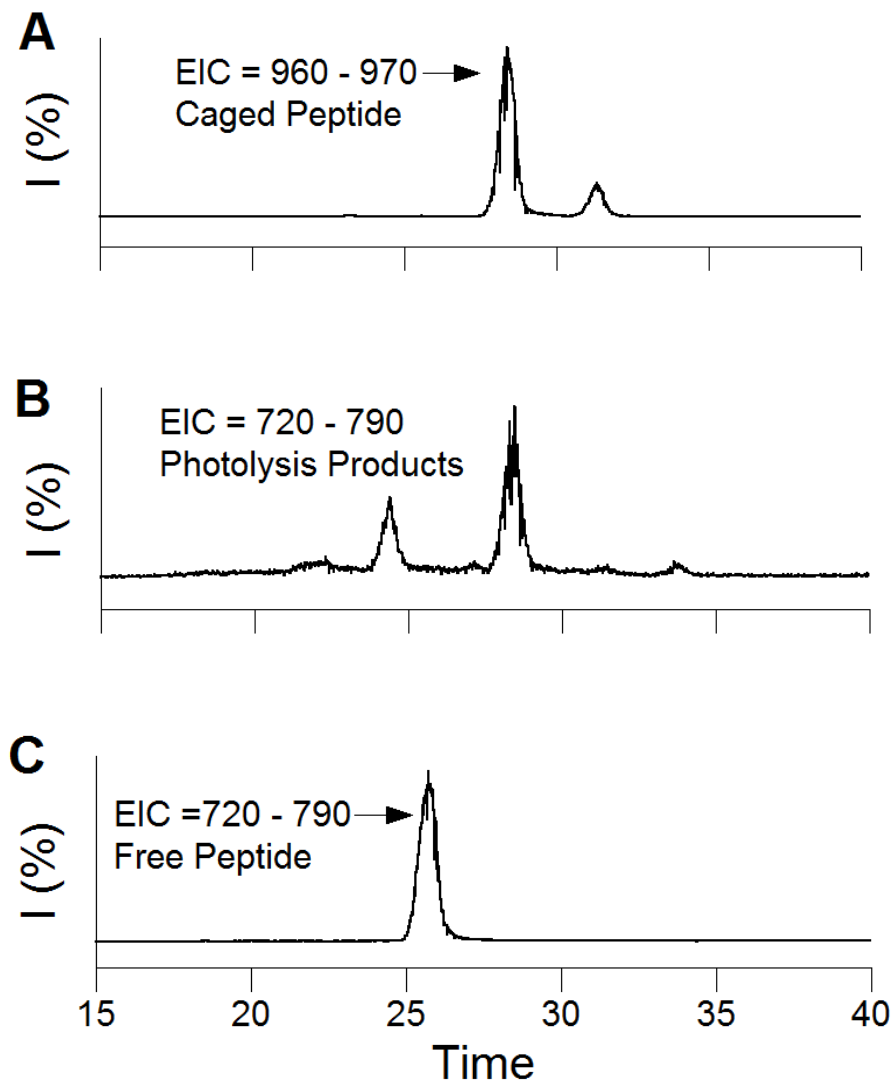

**Figure S6. LC/MS analysis of photolysis reactions containing dansyl-GC(Bhc)VLS.** (A) EIC chromatogram ( $m/z = 960 - 970$ ) of a sample of dansyl-GC(Bhc)VLS without any exposure to UV light; (B) EIC chromatogram ( $m/z = 720 - 790$ ) of a photolyzed sample of dansyl-GC(Bhc)VLS; (C) EIC chromatogram ( $m/z = 720 - 790$ ) of standard sample of dansyl-GCVLS peptide. The absence of any ions related to the free peptide in the photolyzed sample (panel B) indicates that photolysis of dansyl-GC(Bhc)VLS does not lead to the production of free peptide.

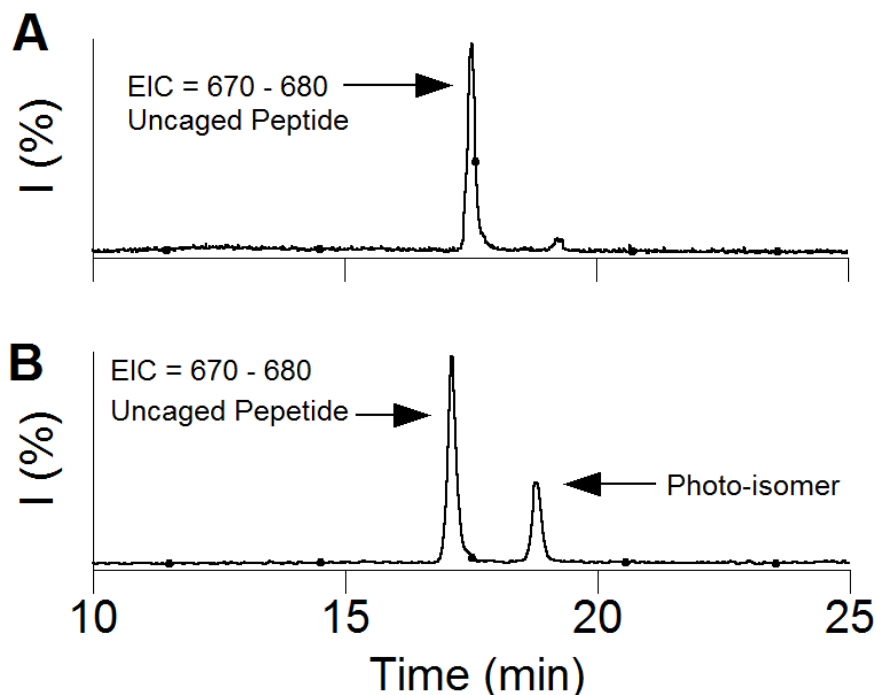

**Figure S7. LC/MS analysis of two-photon photolysis of C(Bhc)VLS leading to generation of a photo-isomer.** (A) EIC chromatogram ( $m/z = 607 - 680$ ) of a sample of C(Bhc)VLS without any exposure to TP irradiation, (B) EIC chromatogram ( $m/z = 607 - 680$ ) of a TP irradiated sample of C(Bhc)VLS which clearly indicates the formation a photo-isomer as evidenced by appearance of a peak at higher retention time having identical mass as starting caged peptide.

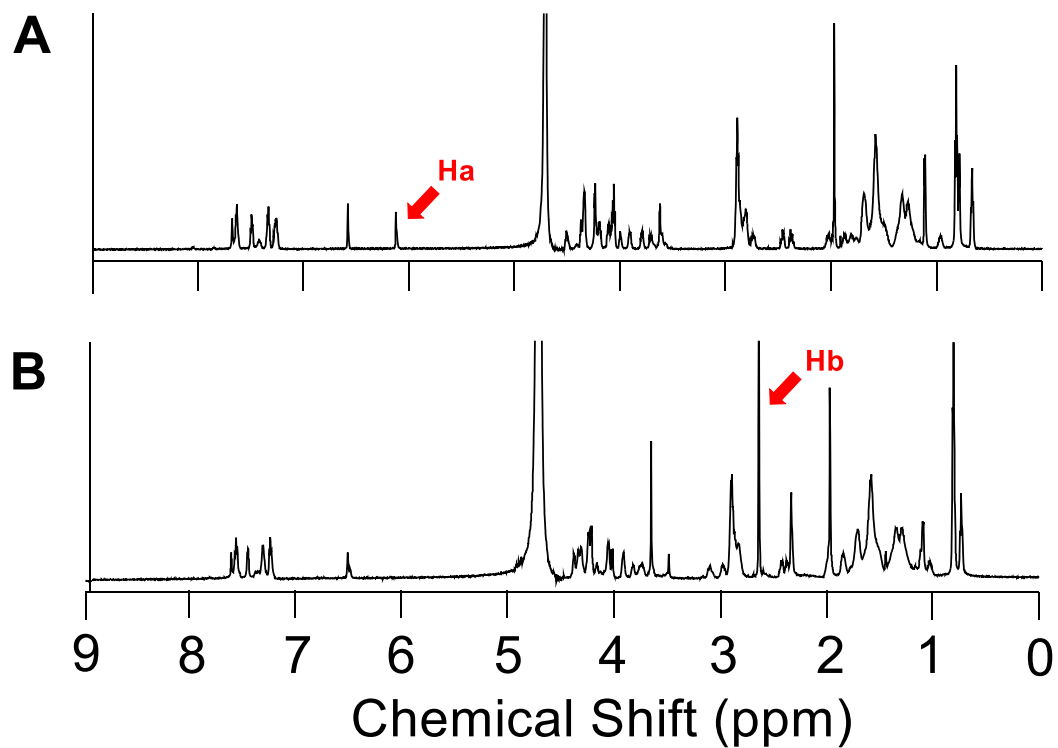

**Figure S8.** (A) <sup>1</sup>H NMR spectrum of a sample of caged peptide **5**, (B) and its photo-isomerized version.

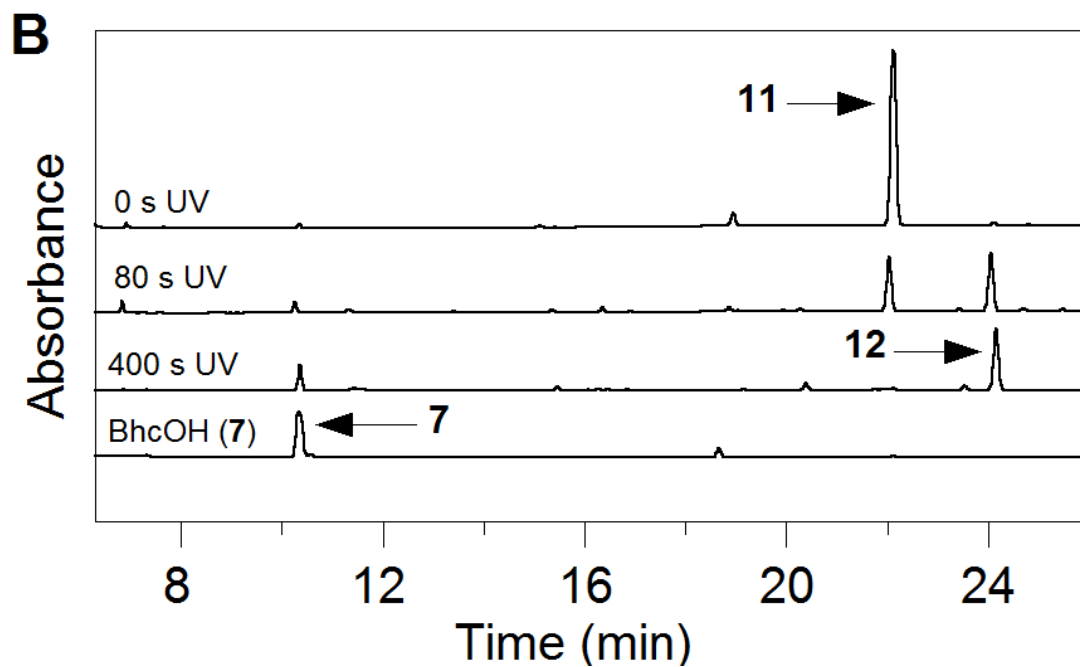

**Figure S9.** HPLC chromatograms representing time-course of photolysis of Bhc protected Boc-cysteamine (**11**).

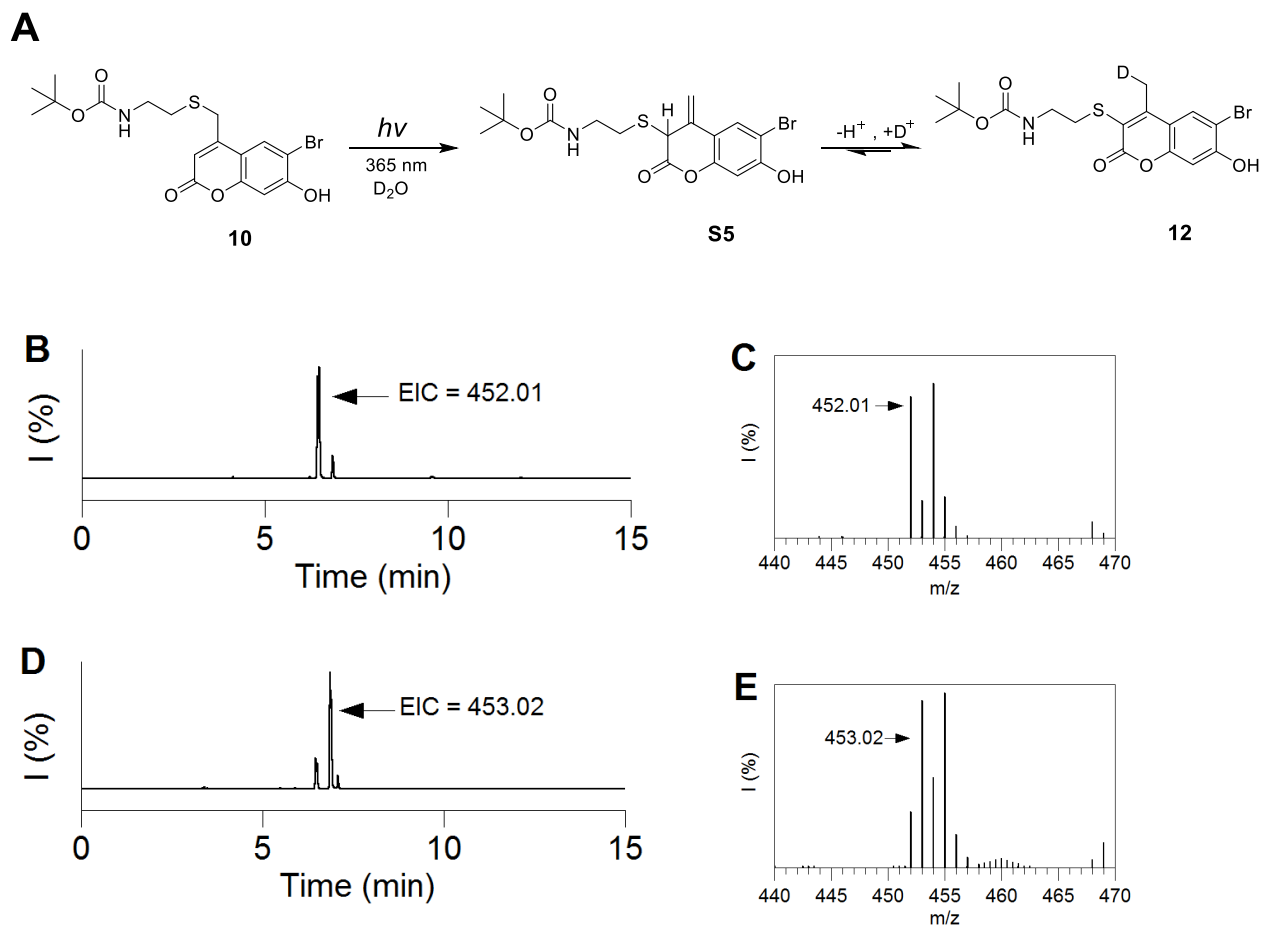

**Figure S10.** (A) Mechanism of photo-rearrangement of Bhc protected Boc-cysteamine (**10**) in  $D_2O$ . A 200  $\mu M$  solution of **10** was irradiated for 2 min in deuterated photolysis buffer and subjected to LC-MS analysis. (B) EIC chromatogram of non-irradiated sample of **10** (calculated value for  $[M + Na]^+ = 452.01$ ), and (C) the corresponding mass spectrum. (D) EIC chromatogram of irradiated sample of **10** (in the presence of  $D_2O$ ) which shows formation of the photo-isomer (**12**) with one unit increase in mass relative to non-irradiated compound (calculated value for  $[M + Na]^+$  is 453.02), and (E) is the corresponding mass spectrum. This data is consistent with the formation of **S5** as a photolysis intermediate and its subsequent tautomerization to form **12**.

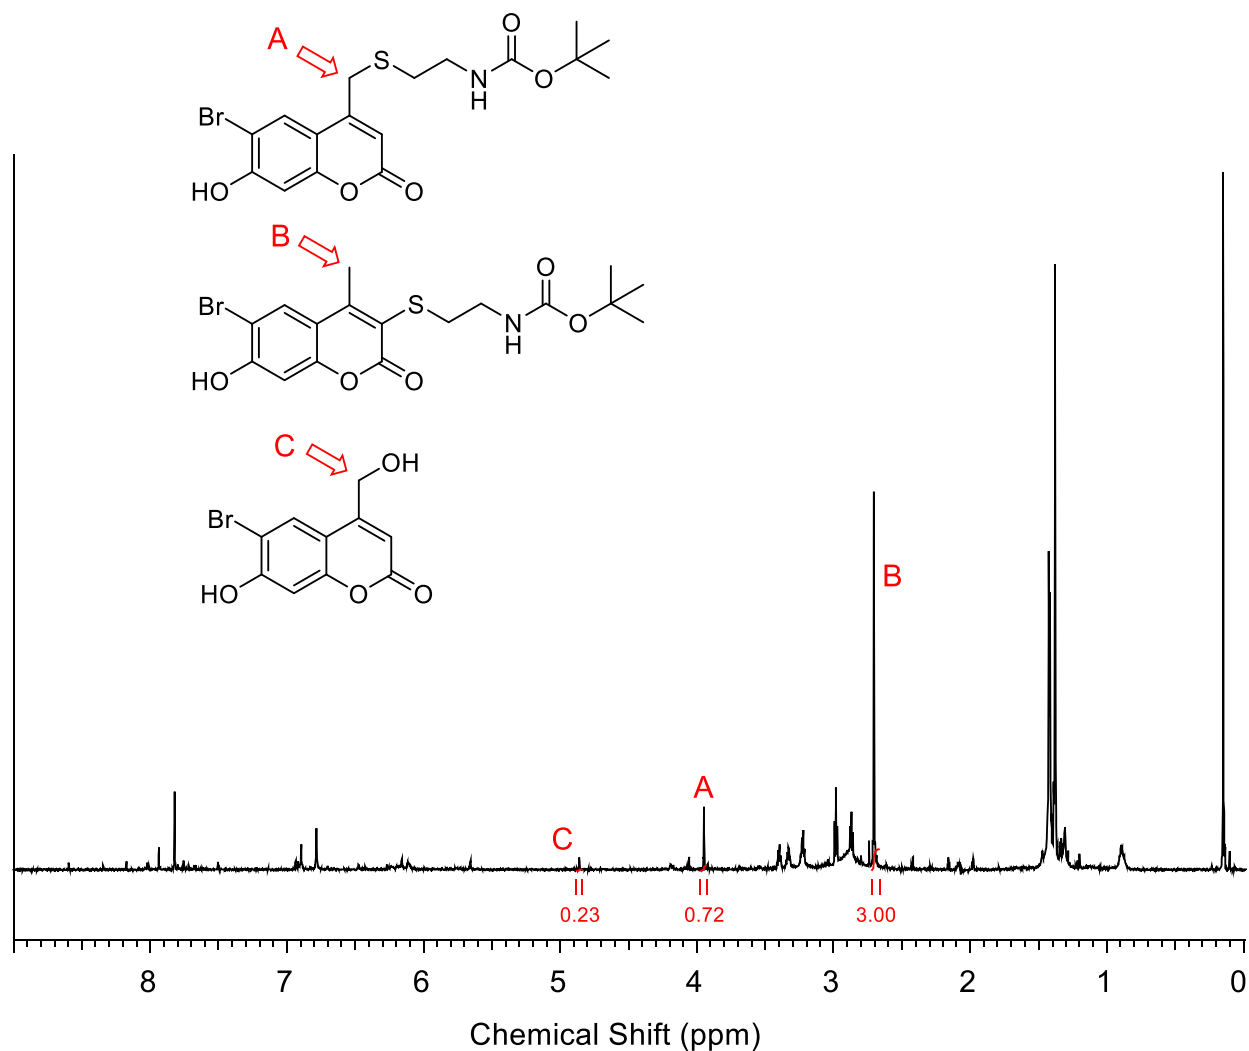

**Figure S11.** Crude NMR spectrum of a photolyzed sample of Boc-Bhc-cysteamine, which indicates the formation of a mixture of photo-isomer and uncaged product with a ratio of 8.7:1.0 (or 3/3H:0.23/2H). A 300  $\mu$ M solution of Boc-Bhc-cysteamine and 1 mM DTT in 50 mM Tris buffer (pH = 7.2) was irradiated at 365 nm, lyophilized and the resulting powder was dissolved in acetone-d<sub>6</sub>, and subjected to NMR analysis (Bruker Advance III 700 MHz spectrometer with 1.7 mm TCI cryoprobe instrument).

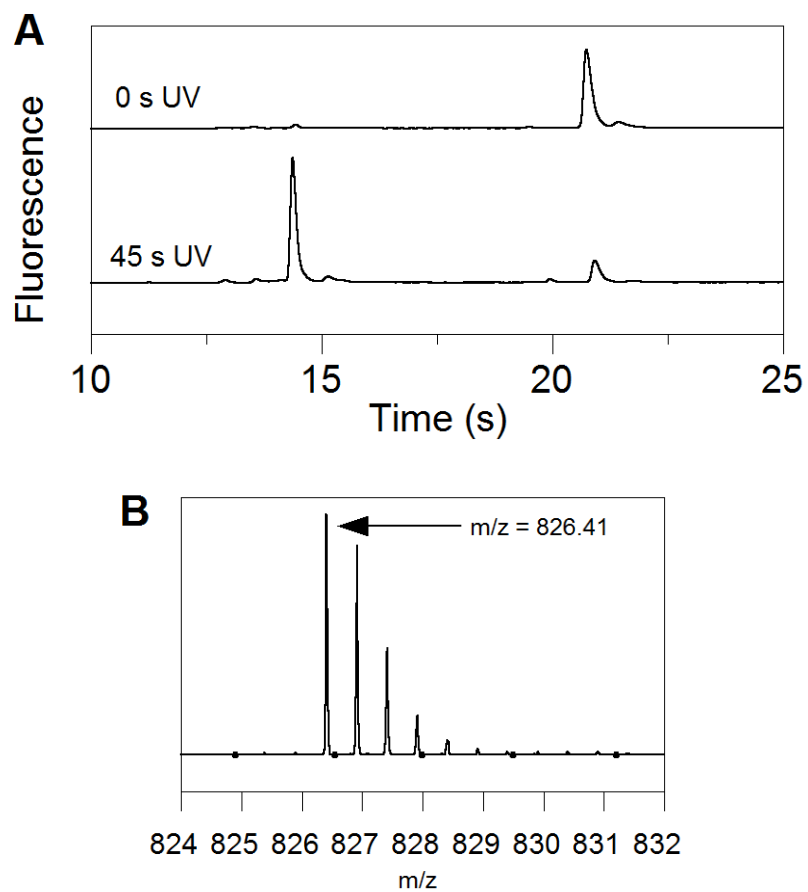

**Figure S12.** (A) HPLC traces demonstrating the clean photo-uncaging of a 100  $\mu\text{M}$  solution of **17b** after 45 s irradiation at 365 nm. (B) mass spectrum of the free peptide (**6b**) (calculated for  $[\text{M}+2\text{H}]^{2+} = 826.41$ ) formed upon uncaging of compound **17b**.

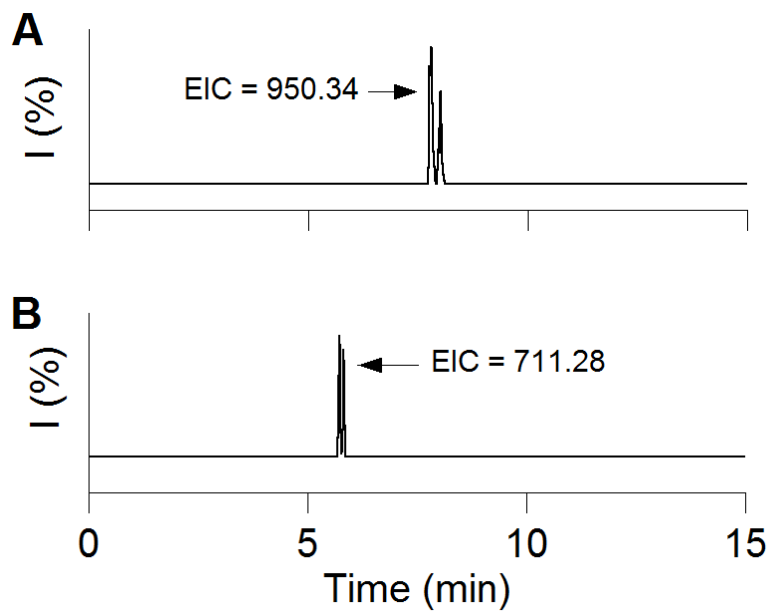

**Figure S13.** (A) EIC chromatogram ( $m/z = 950.34$ ) of a sample of dansyl-GC(NDBF)VLS prior to exposure to UV light; (B) EIC chromatogram ( $m/z = 711.28$ ) of a photolyzed (2 min at 365 nm) sample of dansyl-GC(NDBF)VLS indicating the formation of free peptide (dansyl-GCVLS). MS/MS fragmentation analysis also confirms the sequence of the two peptides (data not shown).

| Ion           | Observed Mass | Calcd Mass | Ion           | Observed Mass | Calcd Mass |
|---------------|---------------|------------|---------------|---------------|------------|
| $[M + 2H]^+$  | 945.9450      | 94.9444    | $B_8^{2+}$    | 765.3291      | 765.3427   |
| $A_1^+$       | 459.1574      | 459.1556   | $B_9^{2+}$    | 814.8596      | 814.8769   |
| $A_8^{2+}$    | 751.3171      | 751.3452   | $B_{10}^{2+}$ | 871.3977      | 871.4189   |
| $A_9^{2+}$    | 800.8800      | 800.8794   | $B_{11}^{2+}$ | 936.9163      | 936.9391   |
| $A_{10}^{2+}$ | 857.4200      | 857.4214   | $C_1^+$       | 504.1795      | 504.1771   |
| $B_1^+$       | 487.1533      | 487.1505   | $C_2^+$       | 632.2553      | 632.2720   |
| $B_2^+$       | 615.2461      | 615.2423   | $C_4^+$       | 847.3880      | 847.3990   |
| $B_3^+$       | 743.3411      | 743.3275   | $C_6^+$       | 1076.5411     | 1076.5417  |
| $B_4^+$       | 830.3443      | 830.3725   | $C_6^{2+}$    | 538.7741      | 538.7747   |
| $B_6^+$       | 1059.4834     | 1059.5151  | $Y_1^+$       | 150.0759      | 150.0589   |
| $B_7^+$       | 1187.5613     | 1187.6101  | $Y_2^+$       | 263.1576      | 263.1430   |
| $B_3^{2+}$    | 372.1808      | 372.1742   | $Y_5^+$       | 832.3501      | 832.3737   |
| $B_5^{2+}$    | 479.7377      | 479.7460   | $Y_8^+$       | 1148.5490     | 1148.5481  |
| $B_5^{2+}$    | 530.2571      | 530.2615   | $Y_9^+$       | 1276.6200     | 1276.6433  |
| $B_7^{2+}$    | 594.3157      | 594.3090   | $Y_{10}^+$    | 1404.6934     | 1404.7384  |

**Table S2.** Calculated and observed MS/MS fragments of 5-Fam-KKKSCTKC(NDBF)VIM.

| Ion           | Observed Mass | Calcd Mass | Ion           | Observed Mass | Calcd Mass |
|---------------|---------------|------------|---------------|---------------|------------|
| $[M + 2H]^+$  | 826.4029      | 826.4148   | $B_6^{2+}$    | 530.2672      | 530.2615   |
| $A_1^+$       | 459.1574      | 459.1556   | $B_7^{2+}$    | 594.3051      | 594.3090   |
| $A_8^{2+}$    | 631.8154      | 631.8161   | $B_8^{2+}$    | 645.8139      | 645.8136   |
| $A_{10}^{2+}$ | 737.8743      | 737.8923   | $B_9^{2+}$    | 695.3403      | 695.3478   |
| $B_1^+$       | 487.1533      | 487.1505   | $B_{10}^{2+}$ | 751.8809      | 751.8898   |
| $B_2^+$       | 615.2423      | 615.2455   | $C_1^+$       | 504.1795      | 504.1771   |
| $B_3^+$       | 743.3394      | 743.3405   | $C_2^+$       | 632.2665      | 632.2720   |
| $B_4^+$       | 830.3569      | 830.3730   | $C_6^{2+}$    | 538.7639      | 538.7748   |
| $B_6^+$       | 1059.4691     | 1059.5151  | $Y_8^+$       | 909.4658      | 909.4902   |
| $B_7^+$       | 1187.5764     | 1187.6101  | $Y_9^+$       | 1037.5529     | 1037.5852  |
| $B_2^{2+}$    | 308.1409      | 308.1267   | $Y_{10}^+$    | 1165.6354     | 1165.6801  |
| $B_3^{2+}$    | 372.1808      | 372.1742   | $Z_{11}^{2+}$ | 817.8973      | 817.9021   |
| $B_5^{2+}$    | 479.7460      | 479.7377   |               |               |            |

**Table S3.** Calculated and observed MS/MS fragments of 5-Fam-KKKSCTKCVIM produced upon uncaging of the corresponding NDBF caged peptide.



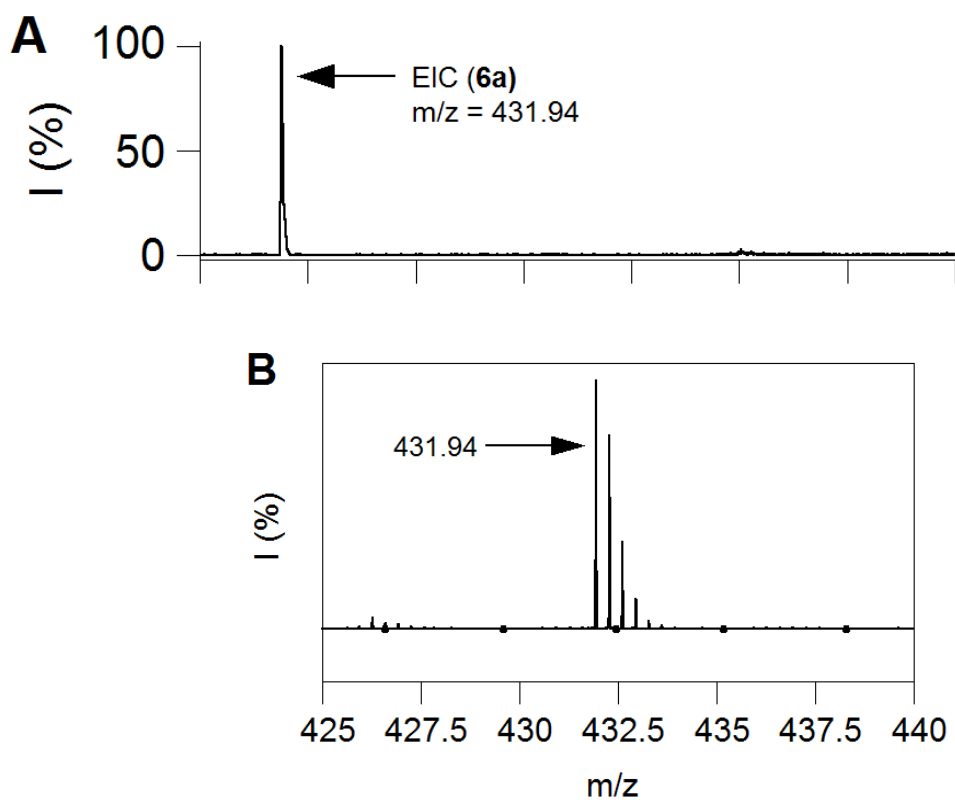

**Figure S14.** (A) EIC chromatogram of TP irradiated (2.5 min) sample of **17a** indicating the formation of free peptide **6a** as a result of uncaging (calculated mass for  $[M+3H]^{3+} = 431.93$ ), and (B) is the corresponding mass spectrum.

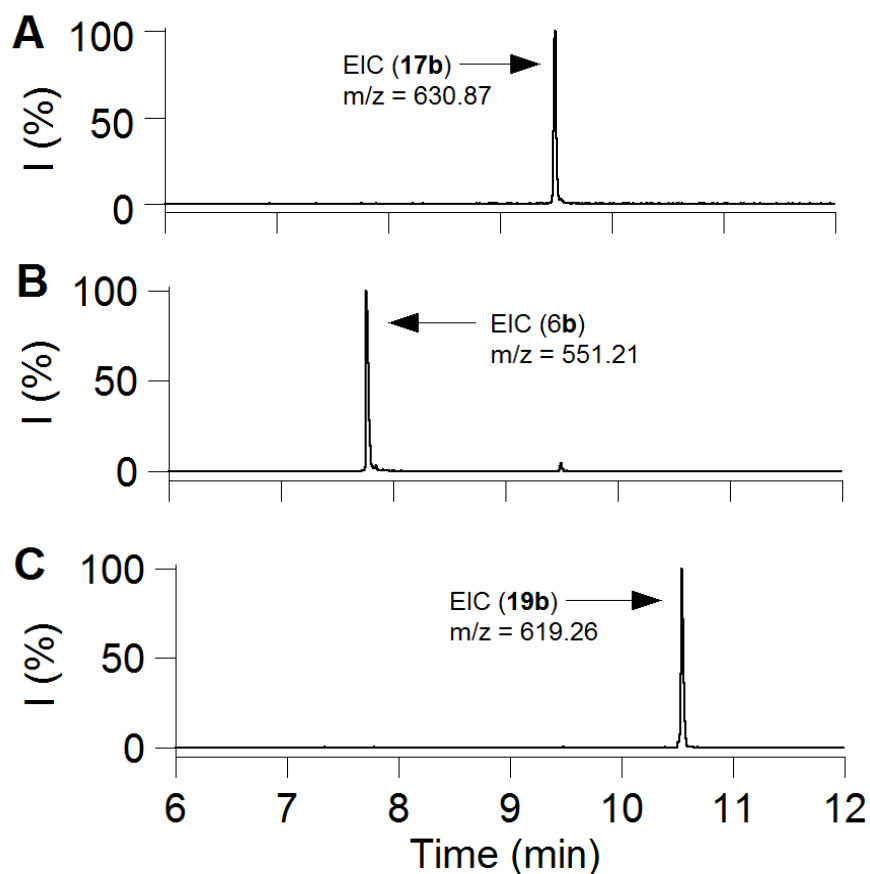

**Figure S15.** (A) EIC chromatogram ( $m/z = 630.30$ - $630.31$ ) of a  $7.5 \mu\text{M}$  solution of **17b**, in prenylation buffer containing PFTase without irradiation, (B) EIC chromatogram ( $m/z = 551.00$ - $552.00$ ) of a solution of **17b**, after 60 s UV irradiation at 365 nm (Rayonet Photoreactor) in prenylation buffer without PFTase, (C) EIC chromatogram ( $m/z = 619.00$ - $620.00$ ) of **17b** after 60 s irradiation at 365 nm (Ti:Sapphire laser, 170 mw, 100 fs) in presence of PFTase showing the formation of farnesylated peptide (**19b**).

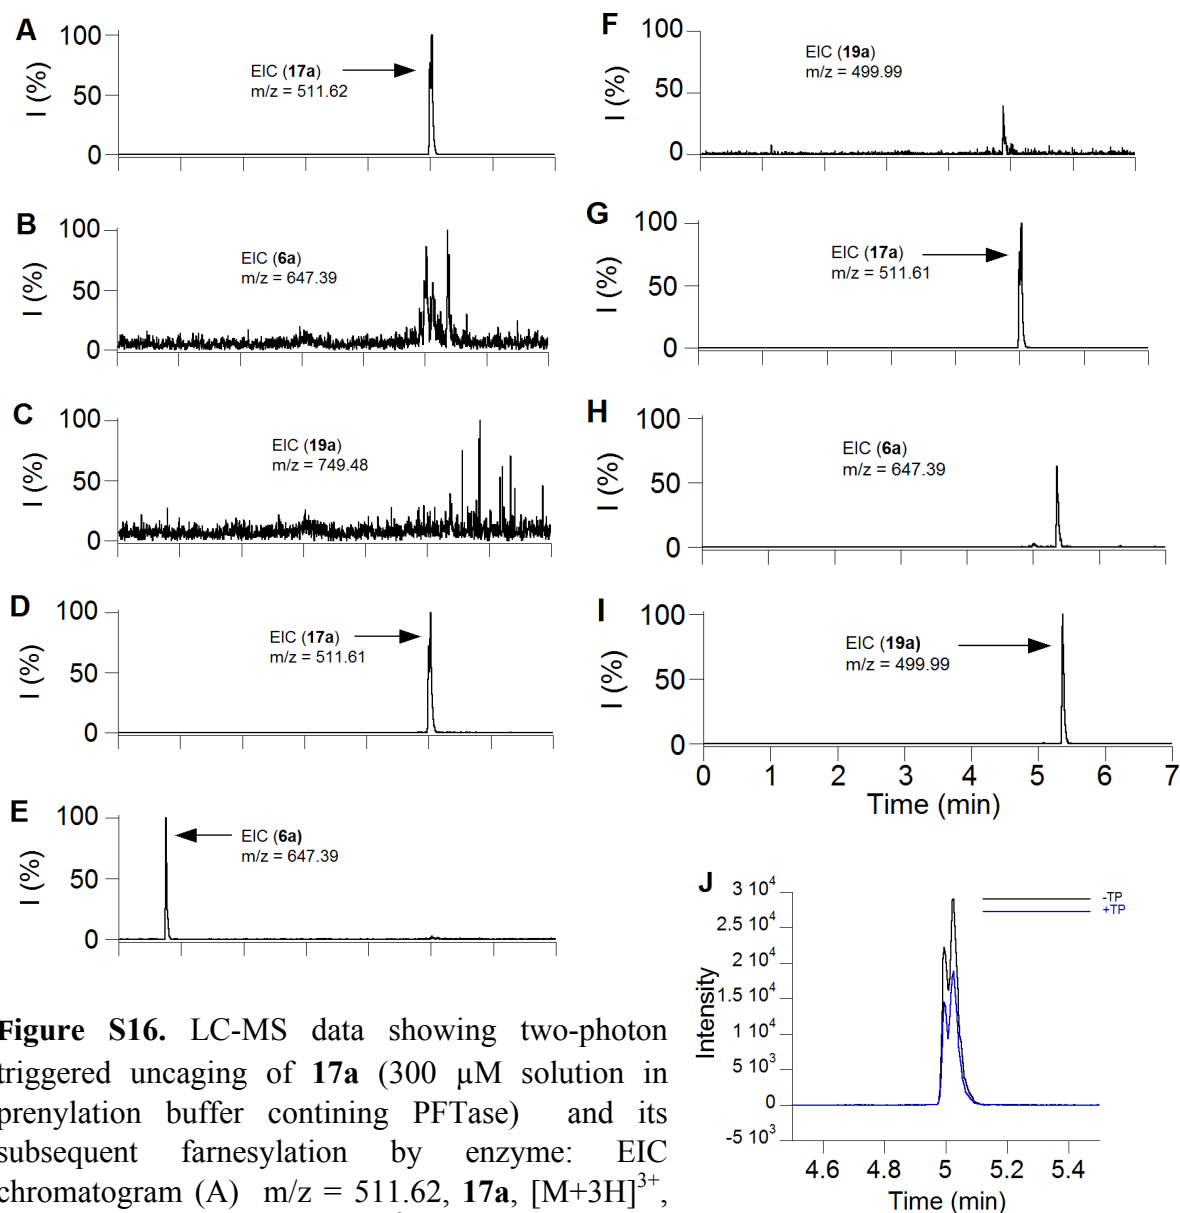

**Figure S16.** LC-MS data showing two-photon triggered uncaging of **17a** (300  $\mu$ M solution in prenylation buffer containing PFTase) and its subsequent farnesylation by enzyme: EIC chromatogram (A)  $m/z = 511.62$ , **17a**,  $[M+3H]^{3+}$ , (B)  $m/z = 647.39$ , **6a**,  $[M+2H]^{2+}$ , (C)  $m/z = 749.48$ , **19a**,  $[M+2H]^{2+}$  of a 300  $\mu$ M solution of **17a**, in prenylation buffer containing PFTase without irradiation, neither uncaged nor the farnesylated peptide has formed; EIC chromatogram (D)  $m/z = 511.62$ , **17a**,  $[M+3H]^{3+}$ , (E)  $m/z = 647.39$ , **6a**,  $[M+2H]^{2+}$ , (F)  $m/z = 749.48$ , **19a**,  $[M+2H]^{2+}$  of a solution of **17a**, after 2.5 min irradiation at 800 nm (Ti:Sapphire laser, 170 mw, 90 fs) in prenylation buffer without PFTase showing the formation of uncaged peptide **6a**; EIC chromatogram (G)  $m/z = 511.62$ , **17a**,  $[M+3H]^{3+}$ , (H)  $m/z = 647.39$ , **6a**,  $[M+2H]^{2+}$ , (I)  $m/z = 749.48$ , **19a**,  $[M+2H]^{2+}$  of **17a** after 2.5 min irradiation at 800 nm (Ti:Sapphire laser, 210 mw, 90 fs) in presence of PFTase showing the formation of farnesylated peptide (**19a**); (J) Analysis of **17a** by LC-MS before and after two-photon irradiation showing 30 % uncaging occurred.

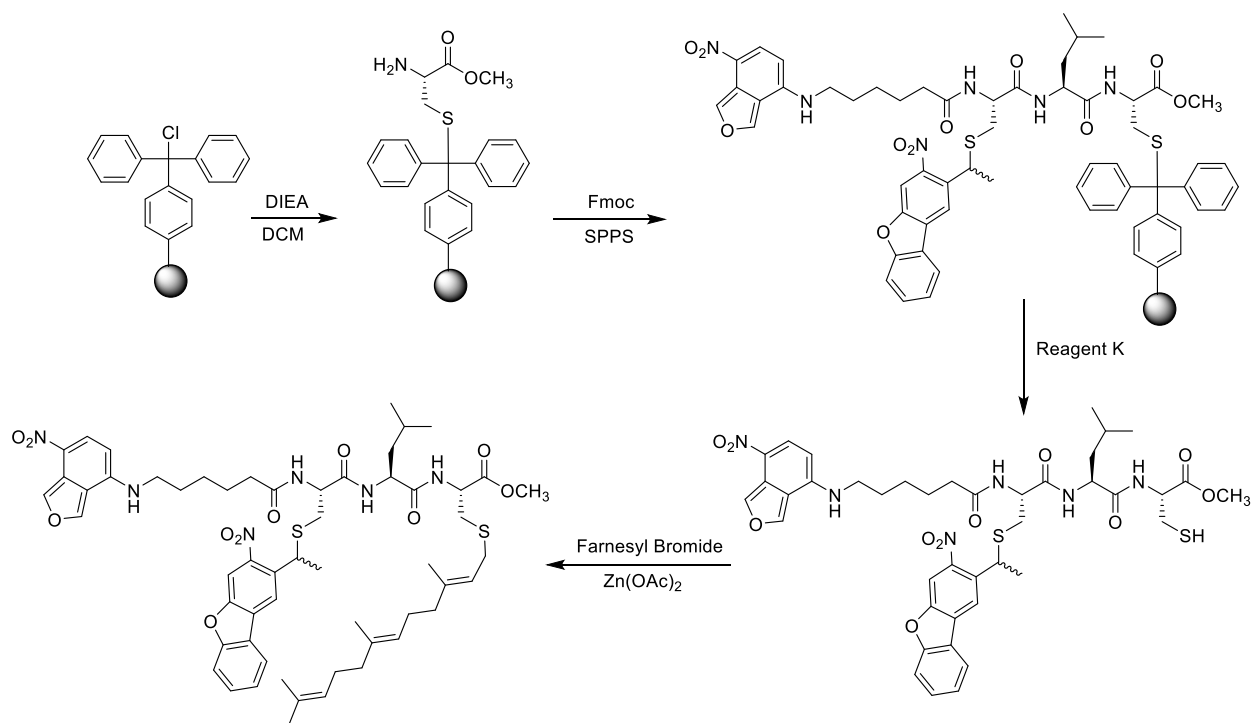

**Figure S17.** Schematic representation of synthesis of NBD-HecC(NDBF)LC(farnesyl)OMe (**20**) via cysteine anchoring method.

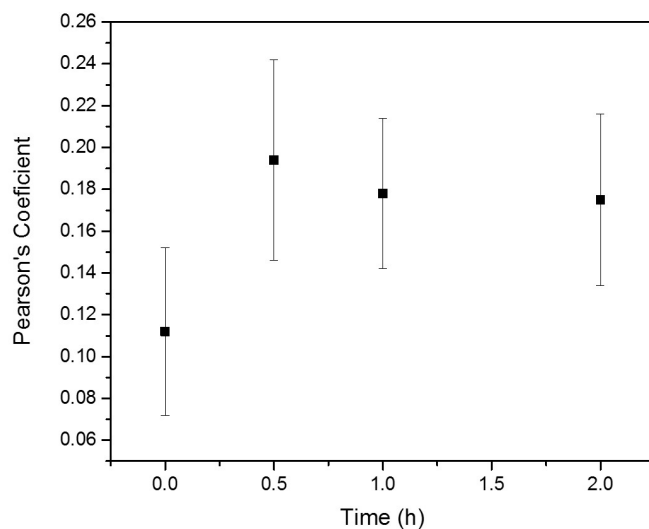

**Figure S18.** Kinetic analysis of peptide colocalization with a plasma membrane marker after uncaging. Live cell experiments in which SKOV-3 cells were treated with **20**, irradiated and the membrane localization of peptide was monitored by fluorescence microscopy over time, and

quantified by measuring the fluorescence co-localization of the peptide and a plasma membrane marker.

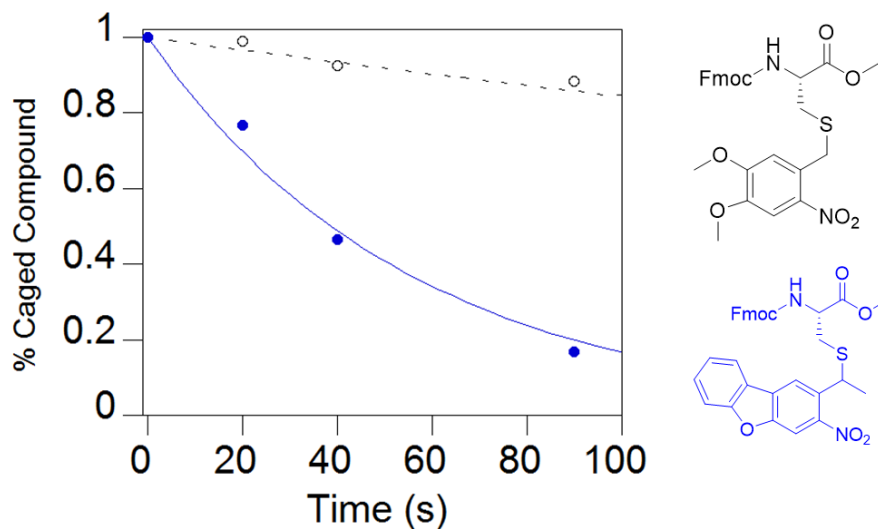

**Figure S19.** Uncaging efficiency of NDBF-protected versus NV-protected Fmoc-Cys-OMe upon UV irradiation (365 nm, Rayonet photo-reactor) obtained by RP-HPLC.

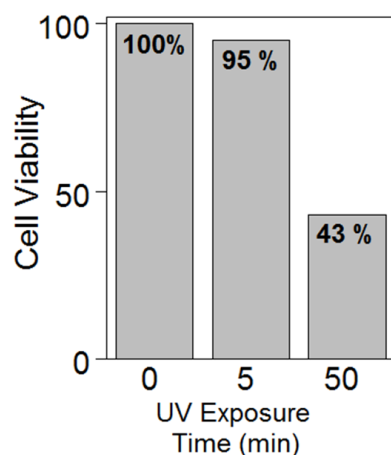

**Figure S20.** Cell viability data obtained via MTT assay, showing how long UV exposure results in major photo-toxicity and cell death. This result highlights the advantages of using highly sensitive NDBF as a caging group for biological studies.

## References

- (1) Momotake, A.; Lindegger, N.; Niggli, E.; Barsotti, R. J.; Ellis-Davies, G. C. R. *Nat. Methods* **2006**, *3*, 35.

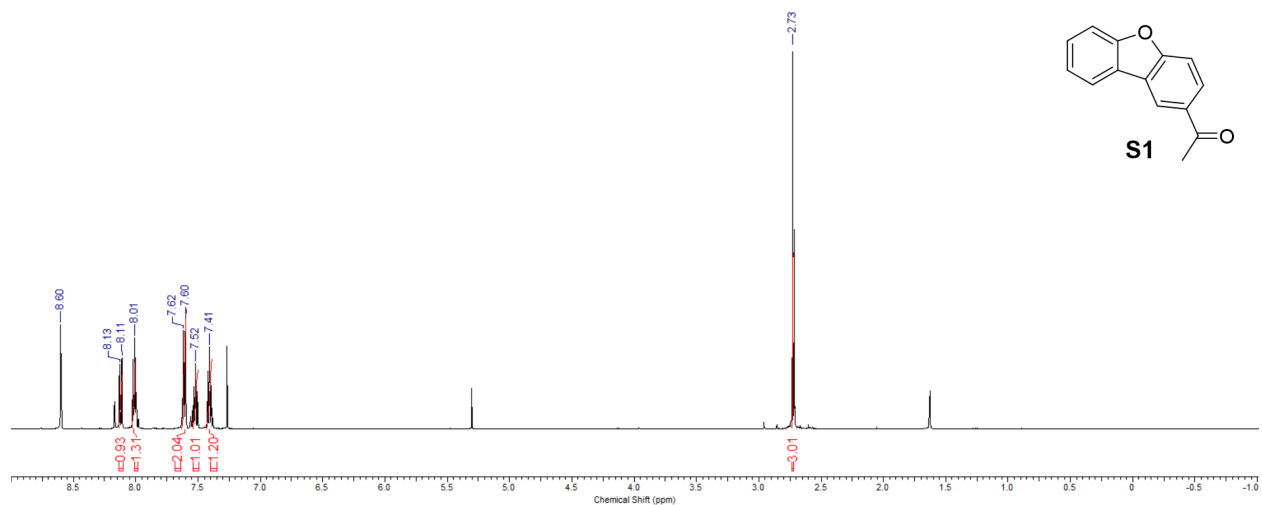

<sup>1</sup>H NMR of Compound **S1** recorded at 500 MHz on a Varian Instrument at 25 °C in CDCl<sub>3</sub>.

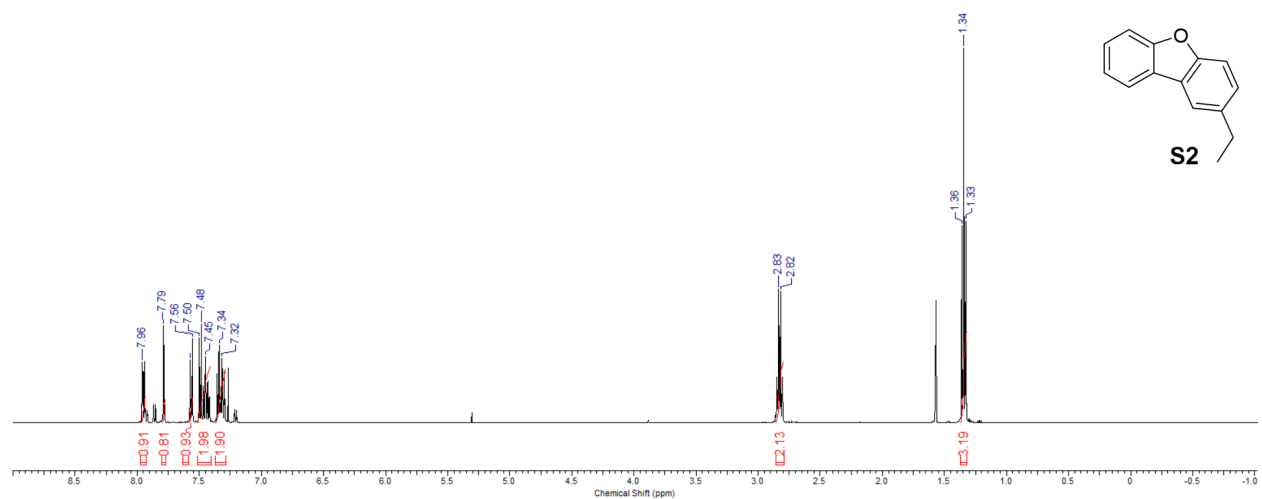

<sup>1</sup>H NMR of Compound **S2** recorded at 500 MHz on a Varian Instrument at 25 °C in CDCl<sub>3</sub>.

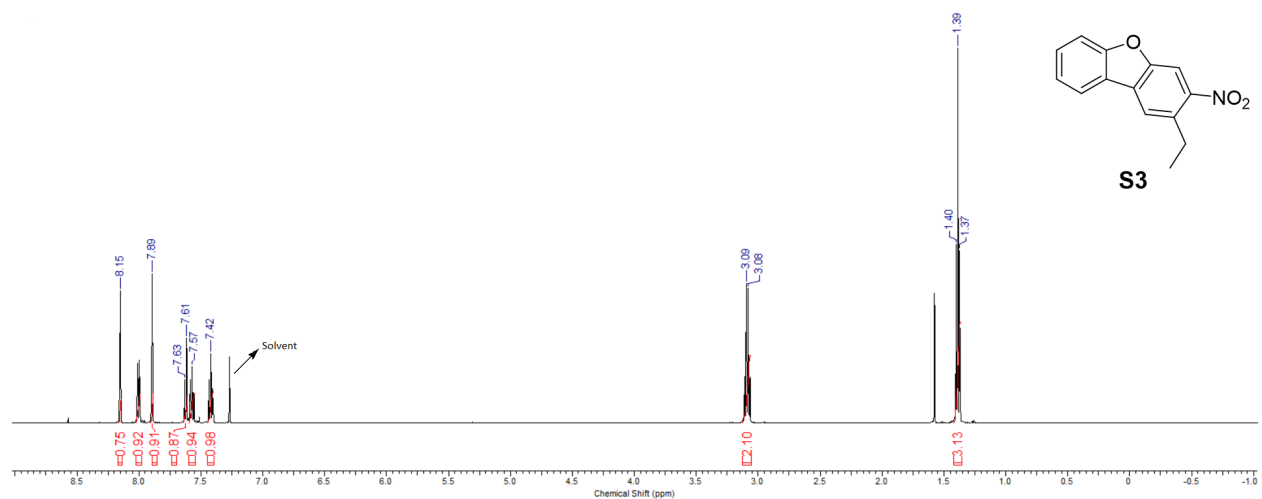

$^1\text{H}$  NMR of Compound **S3** recorded at 500 MHz on a Varian Instrument at 25 °C in  $\text{CDCl}_3$ .

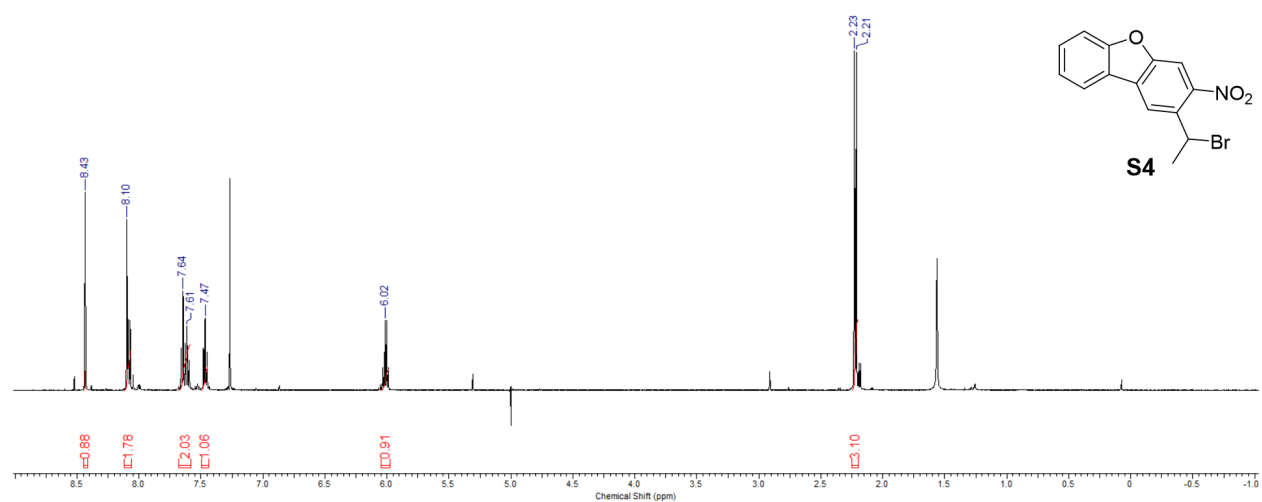

$^1\text{H}$  NMR of Compound **S4** recorded at 500 MHz on a Varian Instrument at 25 °C in  $\text{CDCl}_3$ .

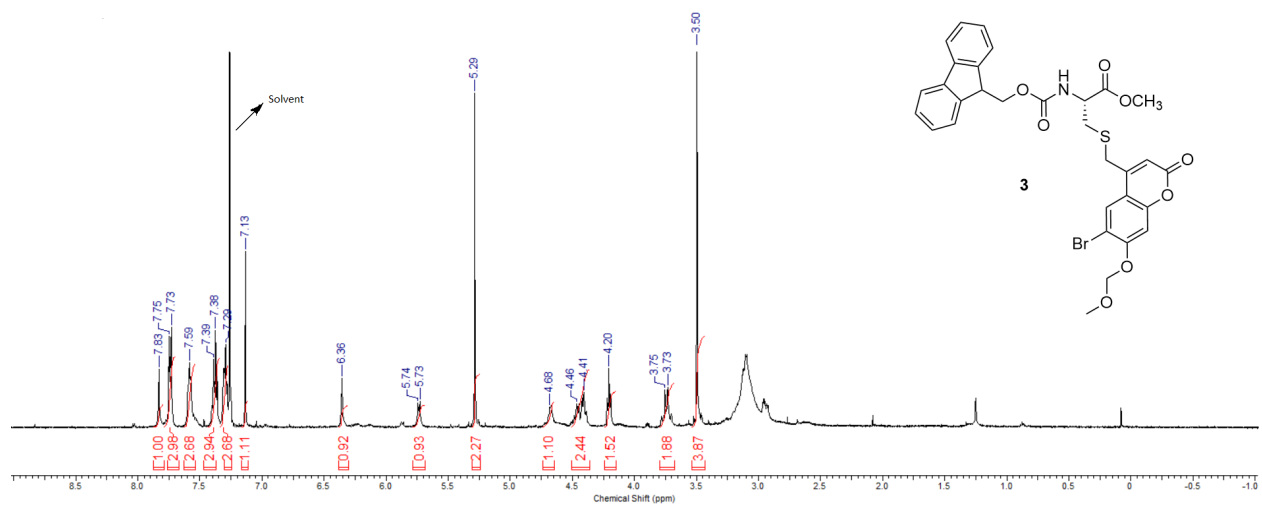

$^1\text{H}$  NMR of Compound **3** recorded at 500 MHz on a Varian Instrument at 25 °C in  $\text{CDCl}_3$ .

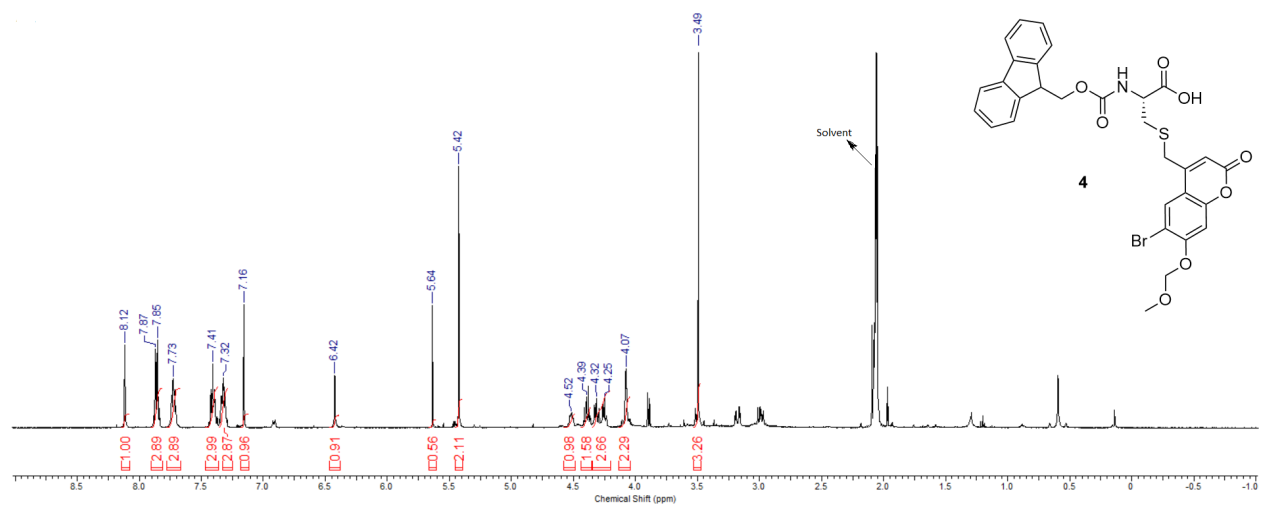

$^1\text{H}$  NMR of Compound **4** recorded at 500 MHz on a Varian Instrument at 25 °C in  $d_6$ -acetone.



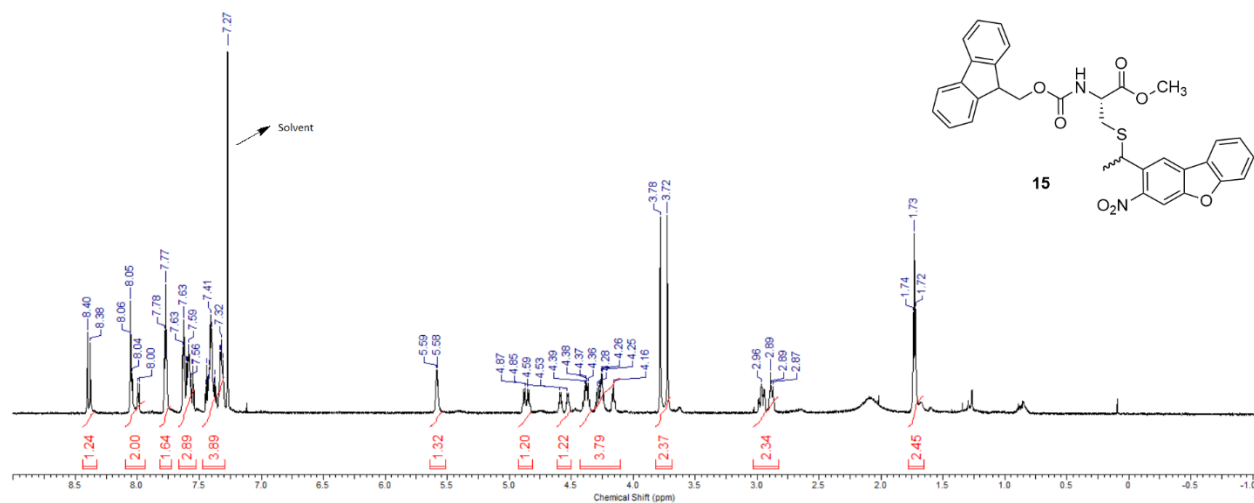

$^1\text{H}$  NMR of Compound **15** recorded at 500 MHz on a Bruker Advance III 700 MHz spectrometer with 1.7 mm TCI cryoprobe at 25 °C in  $\text{CDCl}_3$ .

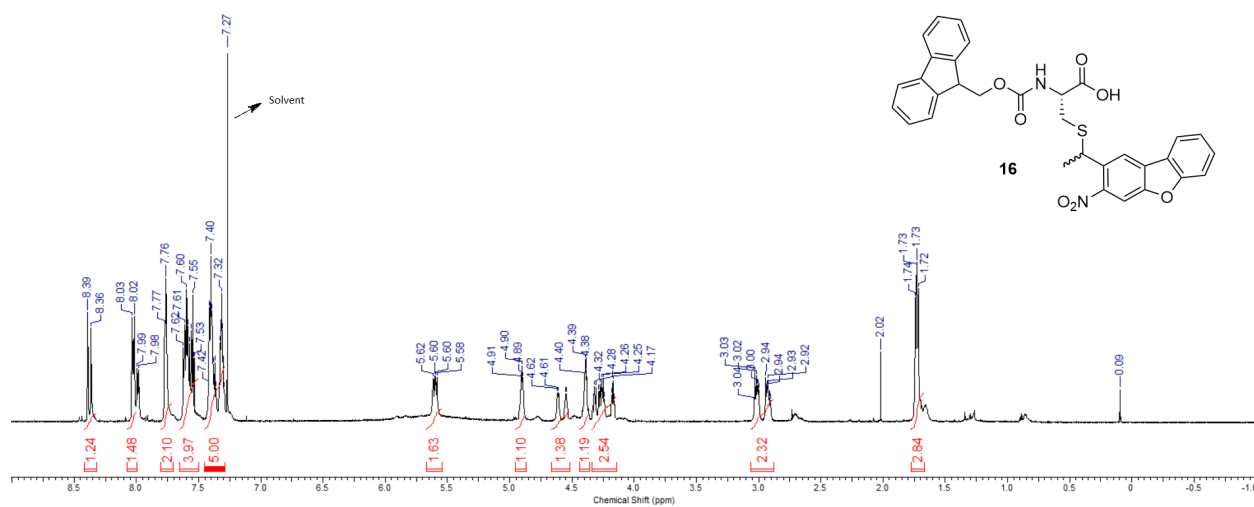

$^1\text{H}$  NMR of Compound **16** recorded at 500 MHz on a Bruker Advance III 700 MHz spectrometer with 1.7 mm TCI cryoprobe at 25 °C in  $\text{CDCl}_3$ .

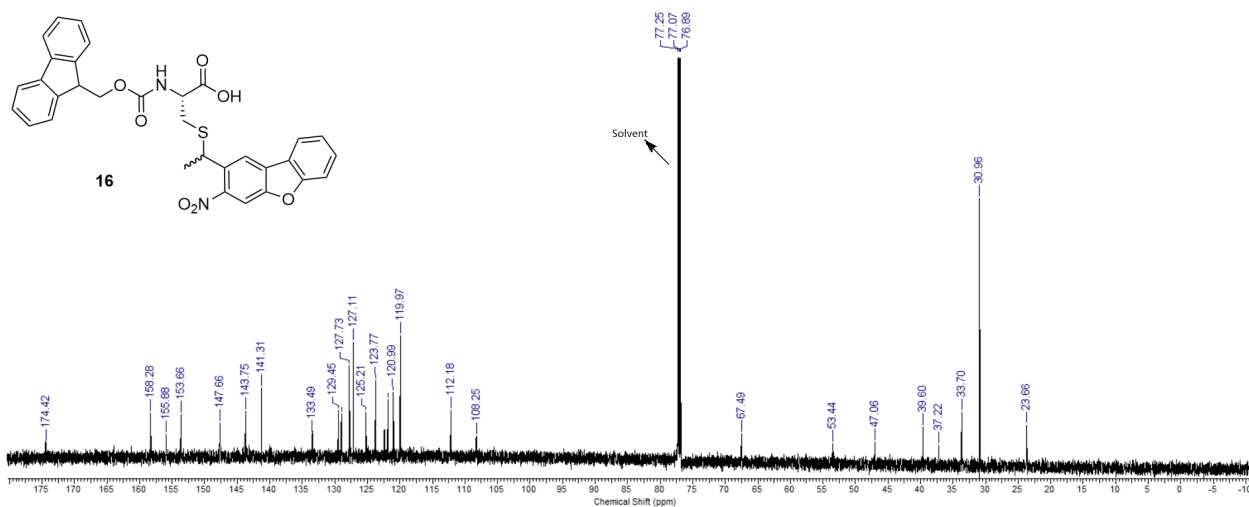

$^{13}\text{C}$  NMR of Compound **16** recorded at 175 MHz on a Bruker Advance III 700 MHz spectrometer with 1.7 mm TCI cryoprobe at 25 °C in  $\text{CDCl}_3$ .

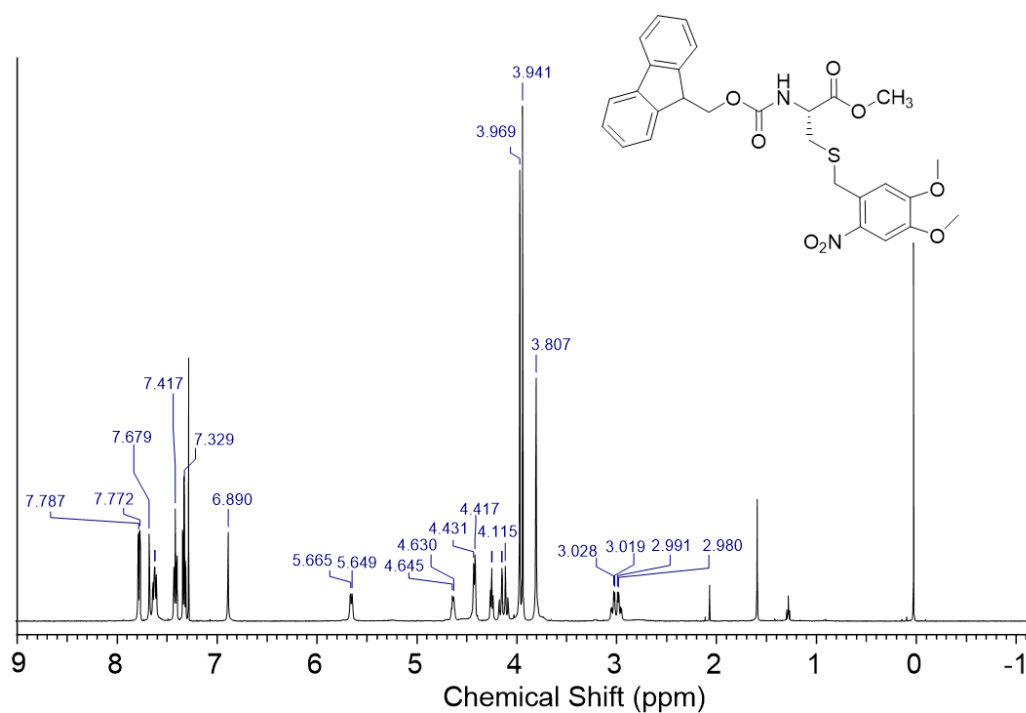

$^1\text{H}$  NMR of Fmoc-Cys(NV)-OMe recorded at 500 MHz on a Bruker Advance III 700 MHz spectrometer with 1.7 mm TCI cryoprobe at 25 °C in  $\text{CDCl}_3$ .
